# Supplementary material for: The reconstructed edges of the hexagonal BN
Source: Royal Society of Chemistry journal article supplement (doi:10.1039/c5nr02143j), 2015-01-01
Supplement: c5nr02143j1.pdf [file c5nr02143j1.pdf]

# Electronic Supplementary Information

## The Reconstructed Edges of the Hexagonal BN

*Ruiqi Zhao,<sup>†,‡,||</sup> Junfeng Gao,<sup>§,||</sup> Zhongfan Liu,<sup>‡,\*</sup> and Feng Ding<sup>§,||,\*</sup>*

<sup>†</sup>School of Physics and Chemistry, Henan Polytechnic University, Henan 454003, China

<sup>‡</sup>State Key Laboratory for Structural Chemistry of Unstable and Stable Species, Beijing National Laboratory for Molecular Sciences (BNLMS), and Center for Nanochemistry, College of Chemistry and Molecular Engineering, Peking University, Beijing 100871, China

<sup>§</sup>Institute of Textiles and Clothing, Hong Kong Polytechnic University, Kowloon, Hong Kong, China

<sup>||</sup> Beijing Computational Science Research Center, Beijing 100084, China

Authors to whom correspondence should be addressed. [feng.ding@polyu.edu.hk](mailto:feng.ding@polyu.edu.hk); [zfliu@pku.edu.cn](mailto:zfliu@pku.edu.cn).

### Contents:

**S1. Models, definitions and calculations of edge energies.**

**S2. Edge energies, band gaps ( $E_g$ ), electronic and magnetic properties.**

## S1. Models, definition and calculations of edge energies.

### (a) Illustration of models and tests.

Composed with binary compositions, triangular BN structures with length,  $L = 2.008$  nm (see Fig. S1a,b) were used to calculate the formation energies,  $\gamma$ , of pristine ZZB and ZZN edges, respectively. The influence from the corners (which does not scale with length of  $L$ ) on  $\gamma$  was tested carefully (Table. S1). More details about calculations of edge energy are discussed below. From Table. S1 we can see that the results are well converged as  $L \geq 1.506$  nm. The BNNR models (see Fig. S1c,d) were used to calculate  $\gamma$  of pristine AC edge and other reconstructed ones.

**Table S1** Edge energies of ZZB and ZZN of triangular BN patches with different length.

| Length of each side of triangular BN patches<br>(nm) | Edge energies of ZZB<br>(eV/nm) | Edge energies of ZZN<br>(eV/nm) |
|------------------------------------------------------|---------------------------------|---------------------------------|
| 0.502                                                | 13.13                           | 11.49                           |
| 0.753                                                | 13.00                           | 11.06                           |
| 1.004                                                | 12.98                           | 10.90                           |
| 1.255                                                | 12.96                           | 10.93                           |
| 1.506                                                | 12.97                           | 10.87                           |
| 1.757                                                | 12.97                           | 10.88                           |

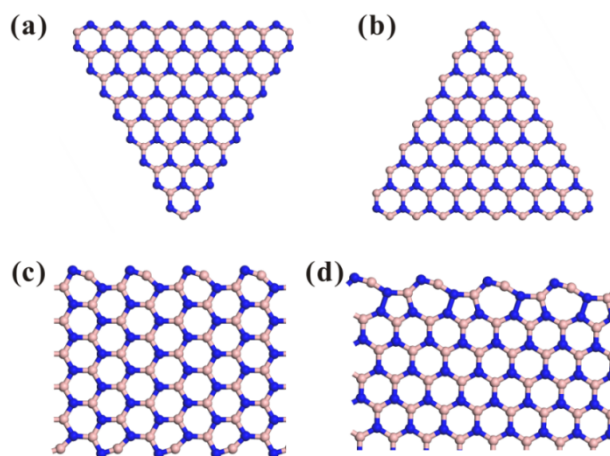

**Fig. S1** Representative structures used to calculate formation energies of different edges: (a) pristine zigzag edges terminated with N, (b) pristine zigzag edges terminated with B, (c) pristine and reconstructed armchair edges, (d) reconstructed zigzag edges.

**(b) Formation energies of pristine edges.**

Unlike graphene, there are three basic edges in BN due to its binary compositions, the edge terminated with N (ZZN), terminated with B (ZZB), and armchair edges (AC). The stabilities of edges can be characterized by their formation energies, i.e., edge energies,  $\gamma$ . A common way to obtain edge energies is to subtract the energy of equivalent material in its bulk from the total slab energy,<sup>1, 2</sup> which can be obtained from density functional theory calculations. Representative structures used to calculate edge energies are shown in Fig. S1. For pristine/reconstructed armchair edges, the energies are defined from equation 1. For pristine zigzag edge terminated with B (N), the energy can be obtained from equation 2 (3).

$$\gamma_{AC} = \frac{E_{AC} - M_{BN}\mu_{BN}}{2L} \quad (1)$$

$$\gamma_{ZZB} = \frac{E_{\Delta} - M_{BN}\mu_{BN} - L\mu_B - \mu_N}{3L} = \gamma_{ZZB}^0 - \frac{\mu}{3} \quad (2)$$

$$\gamma_{ZZN} = \frac{E_{\nabla} - M_{BN}\mu_{BN} - L\mu_N - \mu_B}{3L} = \gamma_{ZZN}^0 + \frac{\mu}{3} \quad (3)$$

$$\gamma_{ZZN57} = \frac{E_{ZZ} - M_{BN}\mu_{BN}}{L} - \gamma_{ZZB} \quad (4)$$

where  $E_{AC}$ ,  $E_{\Delta}$ ,  $E_{\nabla}$ , and  $E_{ZZ}$  is the total energy of an optimized BN structure,  $M_{BN}$  is the number of BN pairs,  $\mu_{BN}$  (-17.57 eV) is the energy of BN pair in BN sheet,  $L$  is the length of BN edges in units of nanometer, and the factors account for identical edges in each model considered. With edge energies of pristine ZZB and ZZN at hand, it is easy to obtain those of reconstructed zigzag edges. Take ZZN57 as an example, the edge energy can be obtained from equation 4.

**(c) Edge energies at different chemical potentials.**

Suppose  $\mu_{BN} = \mu_B + \mu_N$ , the chemical potentials of B and N can be written as  $\mu_B = 0.5\mu_{BN} + \Delta\mu$  and  $\mu_N = 0.5\mu_{BN} - \Delta\mu$ , where  $\Delta\mu = (\mu_B - \mu_N)/2$ .<sup>3</sup> By choosing the elemental chemical potentials as equal,  $\mu_B = \mu_N = 0.5\mu_{BN}$ , that is  $\Delta\mu = 0$ , we determine the values  $\gamma_{ZZB}^0 = 12.96 \text{ eV/nm}$  and  $\gamma_{ZZN}^0 = 10.87 \text{ eV/nm}$ . Now, we can obtain energies for the basic edges of BN at arbitrary chemical potentials:

$$\gamma_{AC} = 7.57 \text{ eV} \quad (5)$$

$$\gamma_{ZZB} = 12.96 - \frac{\Delta\mu}{3} \quad (6)$$

$$\gamma_{ZZN} = 10.87 + \frac{\Delta\mu}{3} \quad (7)$$

For other edges with B/N added,  $\Delta\mu$  is added (subtracted) from corresponding edge energies. And it is contrary in the case with B (N) substituted. The results are listed in Table S1.

#### (d) Formation energies of edges terminated with H atoms.

In this work, we also consider the edges terminated with hydrogen atoms to mimic possible situations in experiments. Here, we only consider the case with each edge atom saturated with one H for simplicity although we notice Ding and coworkers have studied the pristine BNNR edges as a function of H-passivation<sup>4</sup>. We find it is efficient enough to eliminate the influence of triple bond on the edges. In this case, take ZZB as another example, the edge energy can be obtained from equation 9, which is similar with equation 2 except that  $E_\Delta$  is the total energy of BN structure saturated with H,  $n_H$  is the number of H atoms,  $\mu_H$  is the chemical potential of hydrogen, which can be obtained from the DFT calculated energy of  $H_2$  (-6.76 eV),

$$\gamma_{ZZB} = \frac{E_\Delta - M_{BN}\mu_{BN} - L\mu_B - \mu_N - n_H\mu_H}{3L} \quad (9)$$

The chemical potential of hydrogen is highly dependent on the temperature and the pressure. The temperature (and pressure) dependence of  $\mu_H$  can be written as,<sup>5, 6</sup>

$$2\mu_H = E_{H_2} - kT \ln \left( \frac{kT}{p} \times g \times \zeta_{trans} \times \zeta_{rot} \times \zeta_{vib} \right) \quad (10)$$

where  $E_{H_2}$  is DFT calculated energy of  $H_2$  (-6.76 eV),  $k$  is Boltzmann constant,  $p$  is partial pressure of  $H_2$ , and  $g$  is the degeneracy degree of the electron energy level.  $\zeta_{trans}$ ,  $\zeta_{rot}$  and  $\zeta_{vib}$  are the partition functions for translational, rotational, and vibration motions, respectively. Suppose the temperature equals to 1000 K, the pressure of  $H_2$  varies from  $10^{-4}$  mbar to  $10^2$  mbar,  $\mu_H$  falls in the range [-4.74 eV, -4.15 eV]. Substitute -4.74 and -4.15 into Eqn.9, we can get edge energies of ZZB at (1000 K,  $10^{-4}$  mbar) and (1000 K,  $10^2$  mbar) respectively.

**(e) Edge energies at different crystallographic directions.**

With the basic energies along the armchair and zigzag crystallographic directions, it is convenient to obtain all energies of arbitrary edges using the following analytical expressions,<sup>3, 7</sup>

$$\gamma(\chi) = |\gamma_0| \cos\left(\frac{\pi}{6}\right)(\chi + C) \quad (8)$$

$$|\gamma_0| = 2\sqrt{(\gamma_{AC}^2 + \gamma_{ZZX}^2 - \sqrt{3}\gamma_{AC}\gamma_{ZZX})}$$

$$\tan C = \frac{\sqrt{3}\gamma_{AC} - 2\gamma_{ZZB}}{\gamma_{AC}}, \quad 0 < \chi < 30^\circ;$$

$$\tan C = -\frac{\sqrt{3}\gamma_{AC} - 2\gamma_{ZZN}}{\gamma_{AC}}, \quad -30 < \chi < 0^\circ.$$

where  $\gamma_{AC}$ ,  $\gamma_{ZZB}$ , and  $\gamma_{ZZN}$  are the basic energies along armchair edges and zigzag edges terminated with B and N, respectively.

## S2. Edge energies, band gaps ( $E_g$ ), electronic and magnetic properties.

**Table S2.** Edge energies, magnetic properties and band gaps ( $E_g$ ) of edges.

| Edge types                                                                                                                                                                                                 | Bare                           |                       |                                   |                     |            | H-terminated          |                    |                 |                 |
|------------------------------------------------------------------------------------------------------------------------------------------------------------------------------------------------------------|--------------------------------|-----------------------|-----------------------------------|---------------------|------------|-----------------------|--------------------|-----------------|-----------------|
|                                                                                                                                                                                                            | Edge energies (eV/nm)          |                       |                                   | Magnetic properties | $E_g$ (eV) | Edge energies (eV/nm) |                    |                 |                 |
|                                                                                                                                                                                                            | $\gamma^0$ ( $\Delta\mu = 0$ ) |                       | $\gamma^0$ ( $\Delta\mu \neq 0$ ) |                     |            | $\mu_H=-3.38$         |                    | $\mu_H=-4.74^c$ | $\mu_H=-4.15^c$ |
|                                                                                                                                                                                                            | Ours                           | Ref.                  |                                   |                     |            | Ours                  | Ref.               |                 |                 |
| ZZN                                                                                                                                                                                                        | 10.87                          | 10.84 <sup>a,*</sup>  | $\gamma^0 + \Delta\mu/3$          | magnetic            | metallic   | -1.12                 | $\sim -1.20^{a,*}$ | 5.95            | 3.13            |
| ZZN57                                                                                                                                                                                                      | 10.29                          |                       | $\gamma^0 + \Delta\mu/3$          | nonmagnetic         | 3.41       | 5.27                  |                    | 9.95            | 8.07            |
| ZZN57'                                                                                                                                                                                                     | 13.04                          |                       | $\gamma^0 + \Delta\mu/3$          | magnetic            | metallic   | 7.08                  |                    | 11.75           | 9.87            |
| ZZN+B                                                                                                                                                                                                      | 19.30                          |                       | $\gamma^0 - 2\Delta\mu/3$         | nonmagnetic         | 0.88       | 9.86                  |                    | 14.53           | 12.65           |
| ZZN+B+N                                                                                                                                                                                                    | 12.51                          |                       | $\gamma^0 + \Delta\mu/3$          | magnetic            |            | 4.60                  |                    | 9.27            | 7.39            |
| ZZB                                                                                                                                                                                                        | 12.96                          | 12.99 <sup>a,*</sup>  | $\gamma^0 - \Delta\mu/3$          | magnetic            | metallic   | 3.39                  | $\sim 3.19^{a,*}$  | 9.55            | 6.73            |
| ZZB57                                                                                                                                                                                                      | 11.85                          |                       | $\gamma^0 - \Delta\mu/3$          | nonmagnetic         | 2.61       | 7.48                  |                    | 11.25           | 9.37            |
| ZZB57'                                                                                                                                                                                                     | Unstable                       |                       | $\gamma^0 - \Delta\mu/3$          |                     |            | 11.52                 |                    | 15.29           | 13.41           |
| ZZB+N                                                                                                                                                                                                      | 9.87                           |                       | $\gamma^0 + 2\Delta\mu/3$         | nonmagnetic         | 0.26       | 3.50                  |                    | 7.27            | 5.39            |
| ZZB+B+N                                                                                                                                                                                                    | 12.23                          |                       | $\gamma^0 - \Delta\mu/3$          | magnetic            |            | 6.48                  |                    | 10.25           | 8.37            |
| AC                                                                                                                                                                                                         | 7.57                           | 7.57 <sup>a,b,*</sup> | $\gamma^0$                        | nonmagnetic         | 4.25       | 1.18                  | $\sim 0.80^{a,*}$  | 7.44            | 4.72            |
| AC677                                                                                                                                                                                                      | 11.91                          |                       | $\gamma^0$                        | nonmagnetic         | 3.15       | 7.84                  |                    | 14.09           | 11.37           |
| AC677'                                                                                                                                                                                                     | 12.79                          |                       | $\gamma^0$                        | nonmagnetic         | 2.68       | 7.69                  |                    | 13.93           | 11.22           |
| AC+N                                                                                                                                                                                                       | 13.14                          | 12.75 <sup>a,*</sup>  | $\gamma^0 + \Delta\mu$            | nonmagnetic         | 1.12       | 4.96                  |                    | 11.21           | 8.50            |
| AC+B                                                                                                                                                                                                       | 15.20                          | 15.14 <sup>a</sup>    | $\gamma^0 - \Delta\mu$            | nonmagnetic         | 0.018      | 11.60                 |                    | 17.85           | 15.14           |
| AC-Ns                                                                                                                                                                                                      | 9.18                           |                       | $\gamma^0 + 2\Delta\mu$           | nonmagnetic         | 1.31       | 8.18                  |                    | 14.43           | 11.72           |
| AC-Bs                                                                                                                                                                                                      | 22.58                          |                       | $\gamma^0 - 2\Delta\mu$           | magnetic            | 0.72       | 18.44                 |                    | 24.68           | 21.97           |
| <sup>a</sup> data obtained or estimated from ref. 3 <sup>3</sup> ; <sup>b</sup> data from ref. 6 multiplied with 10;                                                                                       |                                |                       |                                   |                     |            |                       |                    |                 |                 |
| <sup>c,d</sup> $\mu_H$ is calculated from Eq.10 at with pressure of 10 <sup>-4</sup> mbar and 10 <sup>2</sup> mbar, respectively; * The data taken from literatures was recalculated in the unit of eV/nm. |                                |                       |                                   |                     |            |                       |                    |                 |                 |

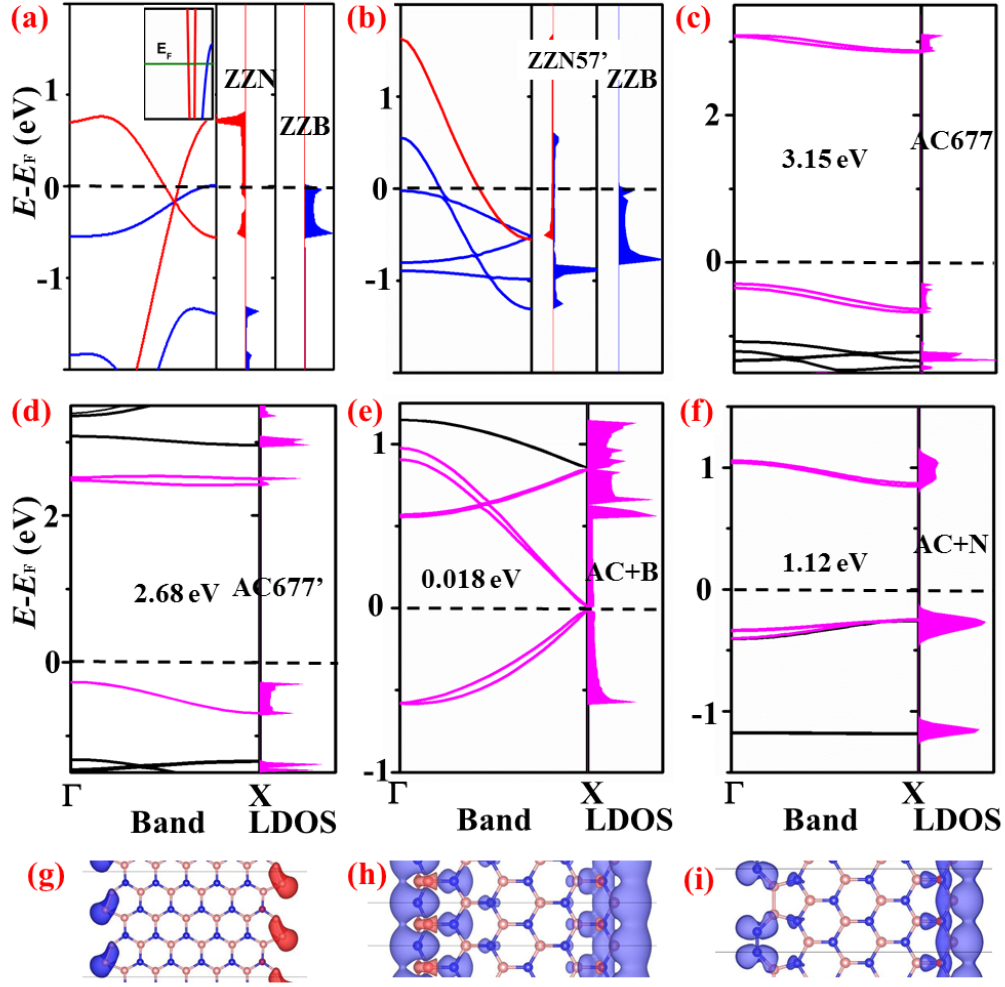

**Fig. S2** (a-f) Band structures of BNNRs and LDOS (local density of states) of other edges mentioned in the text. The BNNRs are composed with edges of (a) ZZB and ZZN, (b) ZZB and ZZN57', (c) AC677, (d) AC677', (e) AC+B, and (f) AC+N, respectively. Spin density of BNNRs constructed with (g) AC-Bs (AFM,  $2.0 u_B/\text{AC site}$  and  $-2.0 u_B/\text{AC site}$  on the other side), (h) ZZB and ZZN (FM,  $-1.83 u_B/\text{ZZ site}$ ), and (i) ZZN57' (FM,  $1.61 u_B/\text{ZZ site}$ ). The Fermi level (dashed lines) is set to zero.  $\Gamma$  and X denotes the center and the boundary of the first Brillouin zone. The bands near Fermi level and LDOS induced by edges are highlighted with the same color except those possessing magnetism, where red means spin-up and blue represents spin-down.

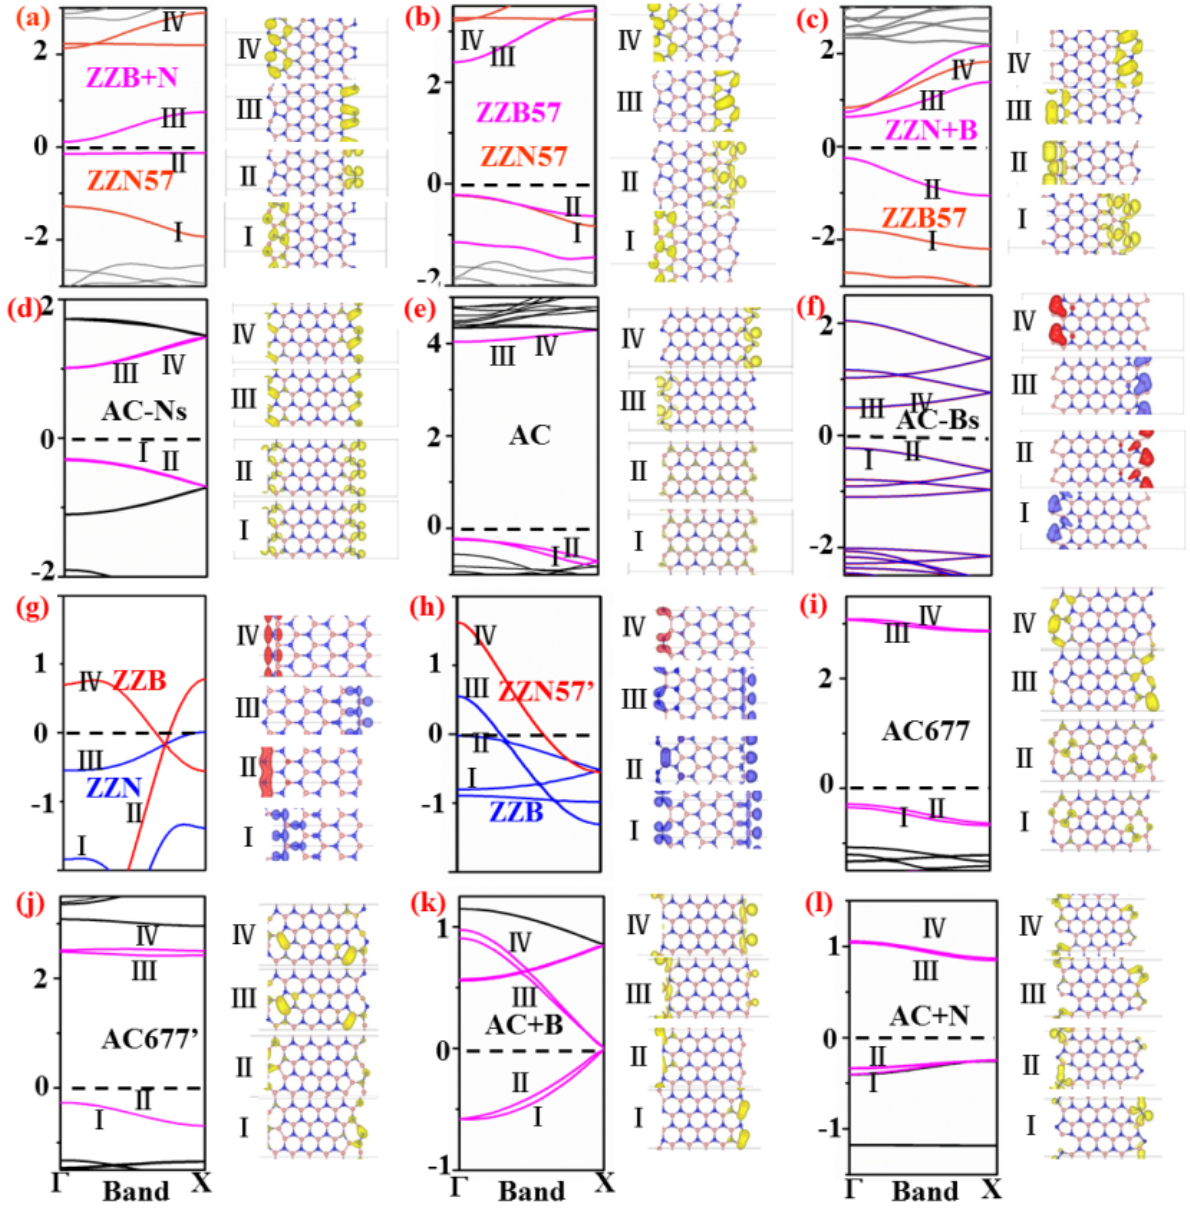

**Fig. S3** (a-l) Band structures of BNNRs and partial charge density of specific bands at the  $\Gamma$  point. The Fermi level (dashed lines) is set to zero.  $\Gamma$  and X denotes the center and the boundary of the first Brillouin zone. The isosurface is  $0.005e/\text{\AA}^3$ .



## References:

1. Conyers, H. *Physical Review B* **1951**, 82, (1), 87-93.
2. Rapcewicz, K.; Chen, B.; Yakobson, B.; Bernholc, J. *Physical Review B* **1998**, 57, (12), 7281-7291.
3. Liu, Y.; Bhowmick, S.; Yakobson, B. I. *Nano Letters* **2011**, 11, (8), 3113-3116.
4. Ding, Y.; Wang, Y.; Ni, J. *Applied Physics Letters* **2009**, 94, (23), 233107-3.
5. Van de Walle, C. G.; Neugebauer, J. *Physical Review Letters* **2002**, 88, (6), 066103.
6. Reuter, K.; Scheffler, M. *Physical Review B* **2001**, 65, (3), 035406.
7. Liu, Y.; Dobrinsky, A.; Yakobson, B. I. *Physical Review Letters* **2010**, 105, (23), 235502.
